# Supplementary material for: Ambito y límites de la doctrina de la imputación objetiva
Source: Royal Society of Chemistry journal article supplement (doi:10.1039/c9dt04693c), 2006-01-01
Supplement: c9dt04693c1.pdf [file c9dt04693c1.pdf]

## Electronic Supporting Information

### Structural Evolution of Ru-bms Complex to The Real Water Oxidation Catalyst of Ru-bda: The Bite Angle Matter

Jing Yang, Bin Liu and Lele Duan\*

*Department of Chemistry, Shenzhen Grubbs Institute and Guangdong Provincial Key Laboratory of Energy Materials for Electric Power, Southern University of Science and Technology (SUSTech), Shenzhen, 518055, P. R. China*  
E-mail: duanll@sustech.edu.cn

**Table S1.** Crystallographic data for **Ru-bms**.

| Complex                              | Ru-bms                                                                           |
|--------------------------------------|----------------------------------------------------------------------------------|
| Empirical formula                    | C <sub>24</sub> H <sub>29</sub> N <sub>4</sub> O <sub>8.5</sub> RuS <sub>2</sub> |
| Formula weight                       | 674.70                                                                           |
| Temperature/K                        | 296.15                                                                           |
| Crystal system                       | triclinic                                                                        |
| Space group                          | P-1                                                                              |
| a/Å                                  | 14.085(4)                                                                        |
| b/Å                                  | 15.200(5)                                                                        |
| c/Å                                  | 15.861(5)                                                                        |
| α/°                                  | 109.863(4)                                                                       |
| β/°                                  | 110.609(4)                                                                       |
| γ/°                                  | 100.390(4)                                                                       |
| Volume/Å <sup>3</sup>                | 2810.3(15)                                                                       |
| Z                                    | 4                                                                                |
| ρ <sub>calc</sub> /g/cm <sup>3</sup> | 1.595                                                                            |
| μ/mm <sup>-1</sup>                   | 0.762                                                                            |
| F(000)                               | 1380.0                                                                           |
| Crystal size/mm <sup>3</sup>         | 0.14 × 0.12 × 0.1                                                                |
| Radiation                            | MoKα (λ = 0.71073)                                                               |
| 2θ range for data collection/°       | 3.224 to 55.04                                                                   |
| Index ranges                         | -18 ≤ h ≤ 18, -19 ≤ k ≤ 19, -20 ≤ l ≤ 20                                         |
| Reflections collected                | 25294                                                                            |
| Independent reflections              | 12640 [R <sub>int</sub> = 0.0602, R <sub>sigma</sub> = 0.0984]                   |
| Data/restraints/parameters           | 12640/13/728                                                                     |
| Goodness-of-fit on F <sup>2</sup>    | 0.964                                                                            |
| Final R indexes [I >= 2σ (I)]        | R <sub>1</sub> = 0.0506, wR <sub>2</sub> = 0.1072                                |

Final R indexes [all data]  
Largest diff. peak/hole/e  $\text{\AA}^{-3}$

$R_1 = 0.0892$ ,  $wR_2 = 0.1214$   
0.90/-1.28

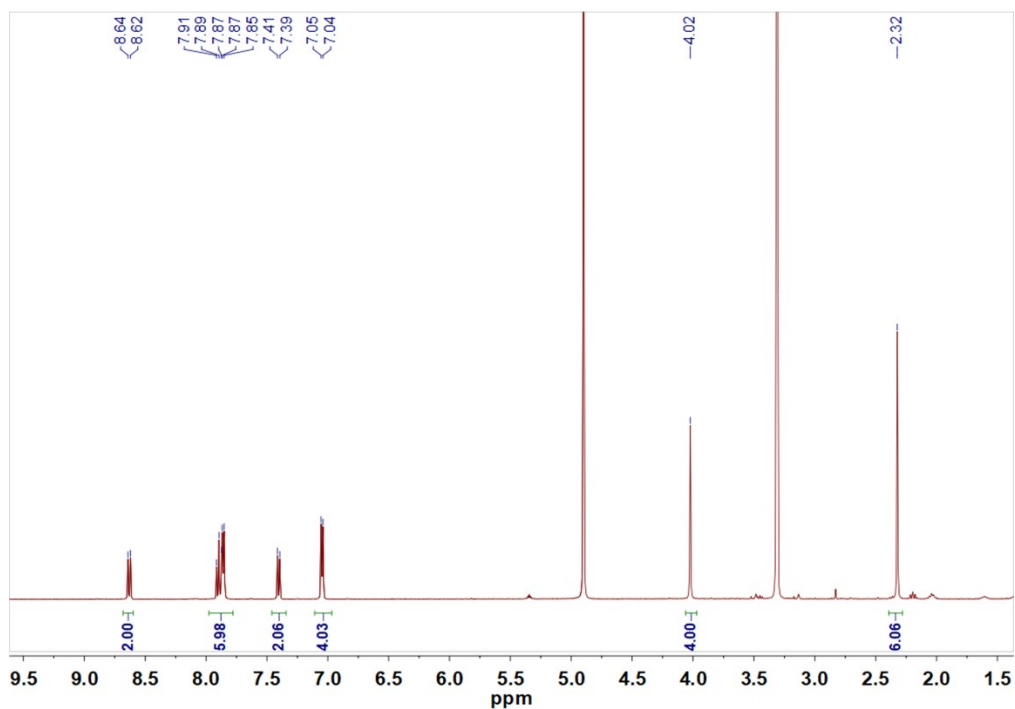

Figure S1.  $^1\text{H}$  NMR spectrum (400 MHz) of Ru-bms in  $d_4$ -methanol.

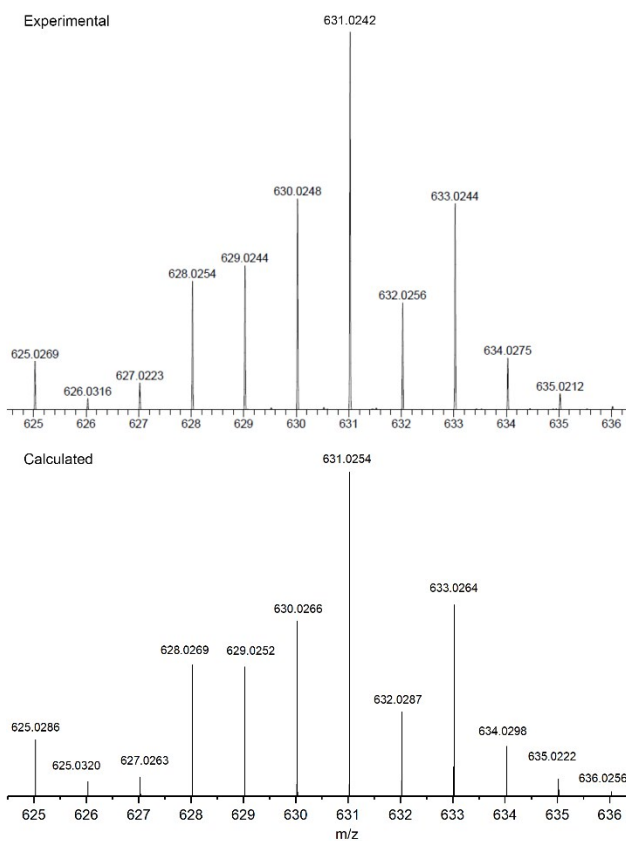

Figure S2. HRMS spectra of  $[\text{Ru-bms} + \text{H}^+]$  (top) and calculated isotopic distribution (bottom).
